# Supplementary material for: How Does Reviewing the Evidence Change Veterinary Surgeons’ Beliefs Regarding the Treatment of Ovine Footrot? A Quantitative and Qualitative Study
Source: PubMed Central journal article supplement (PMC3655936; doi:10.1371/journal.pone.0064175), 2013-05-16

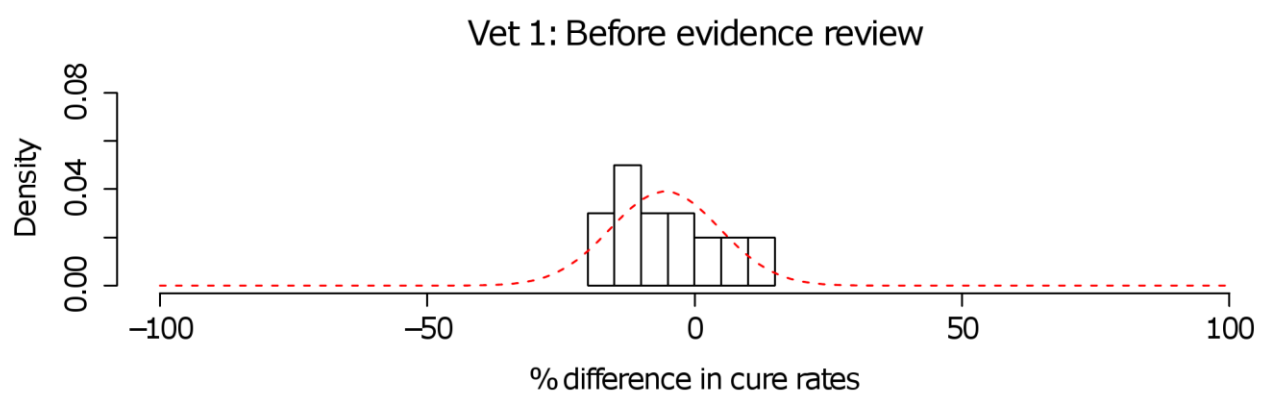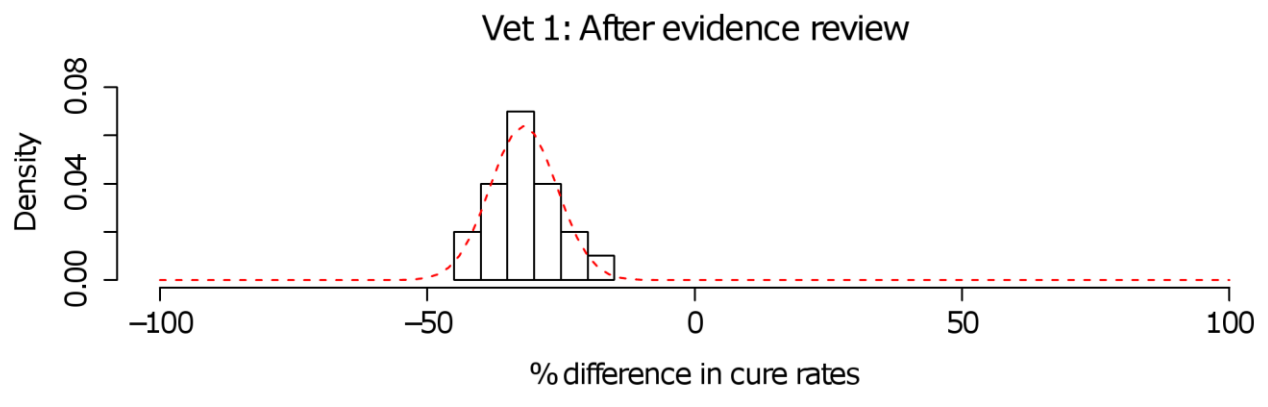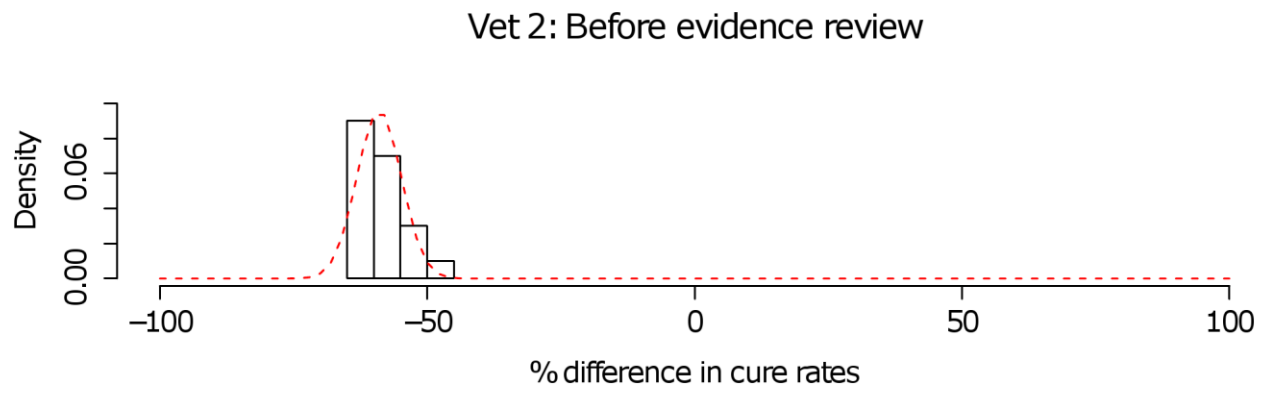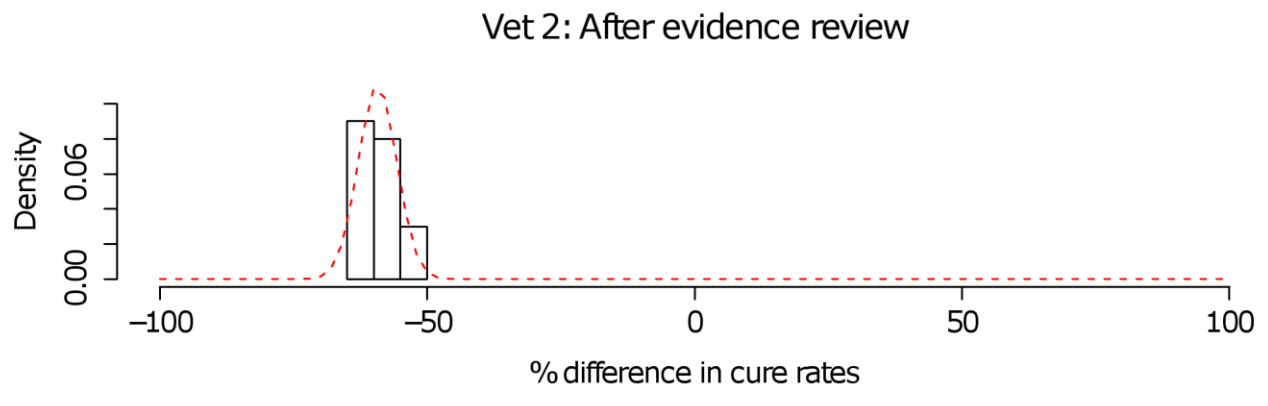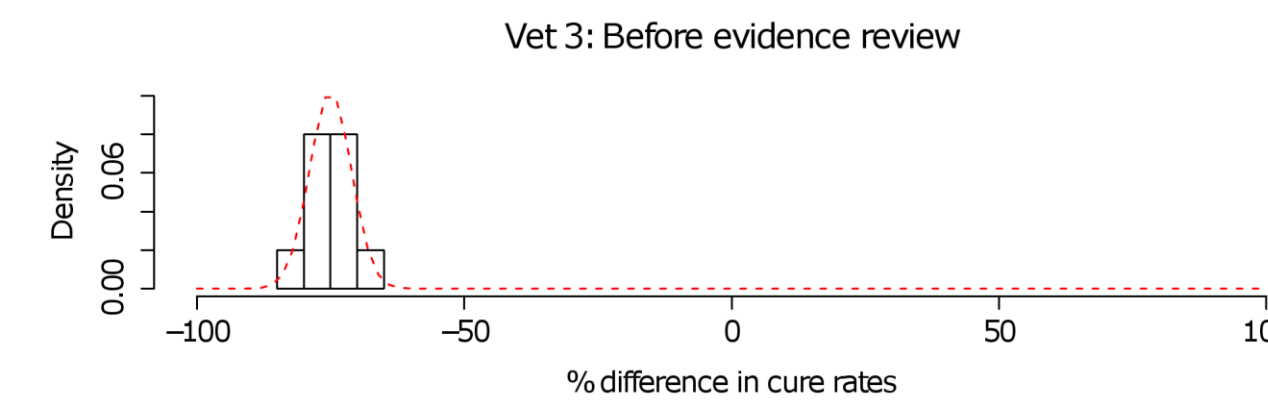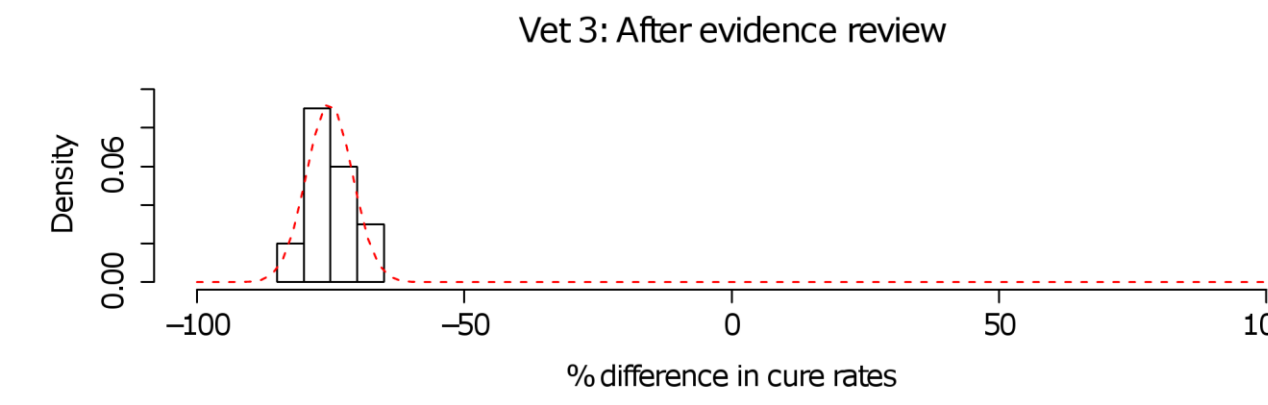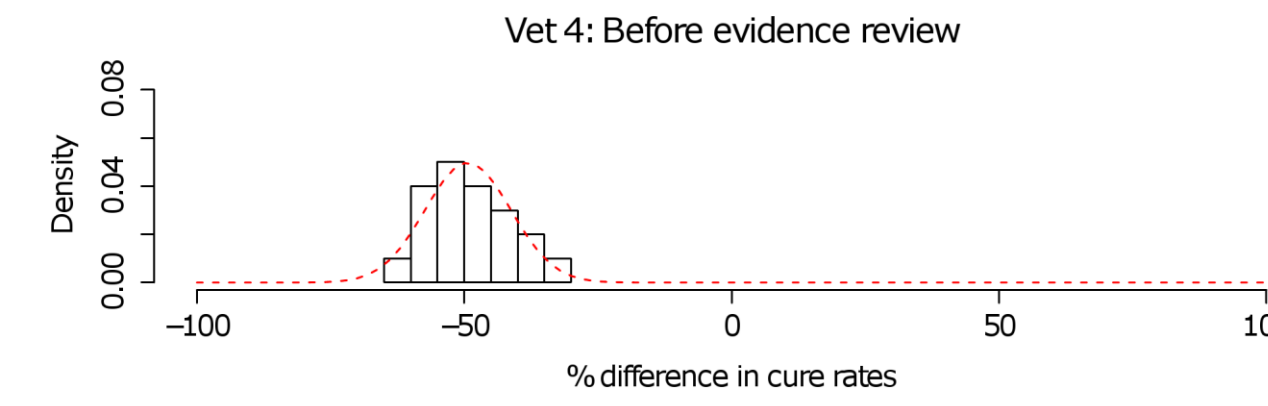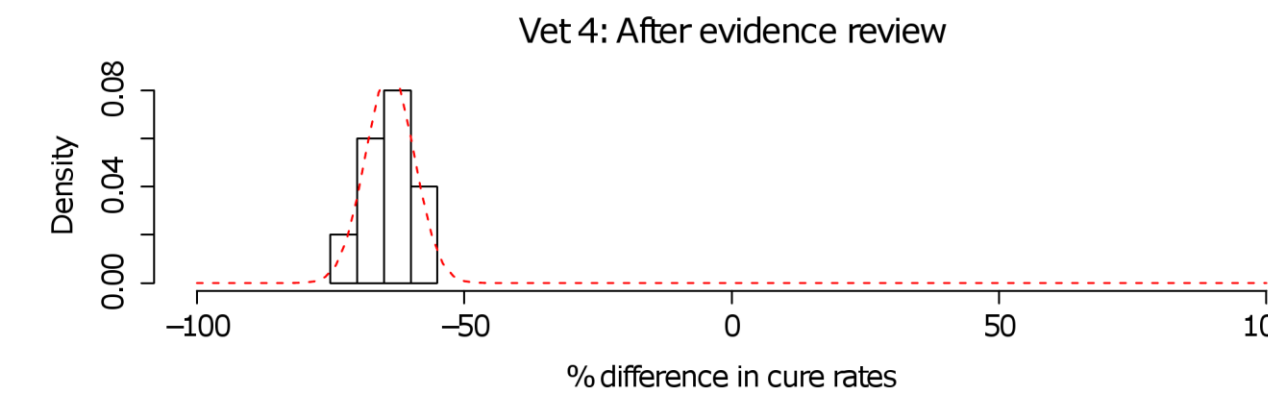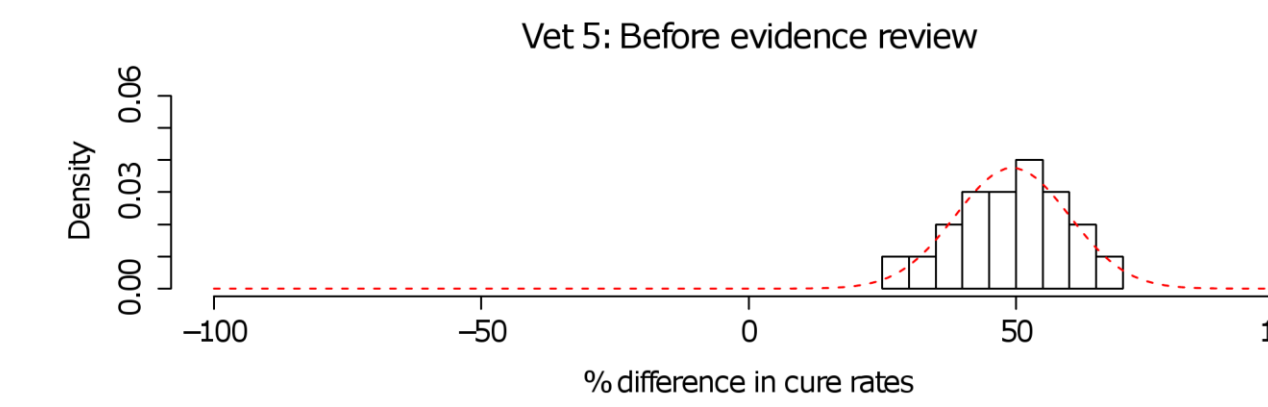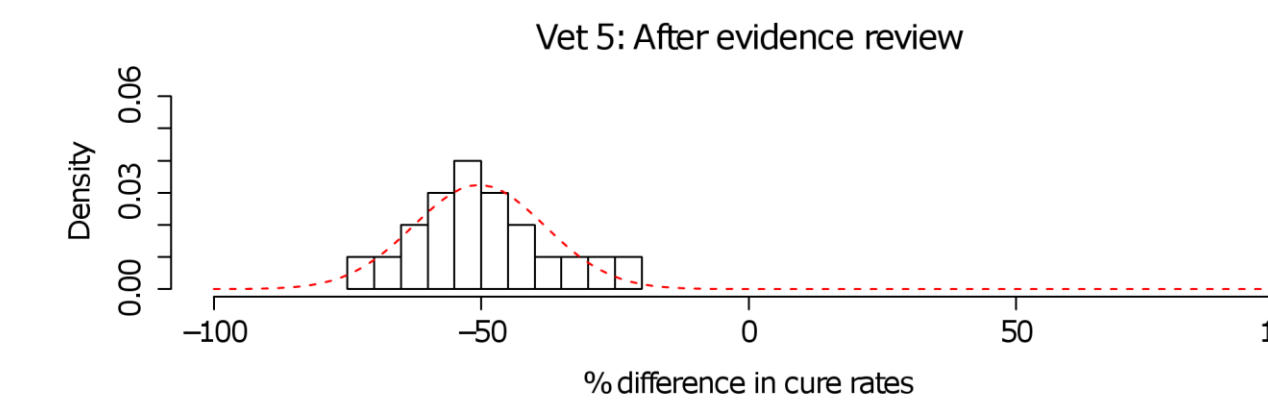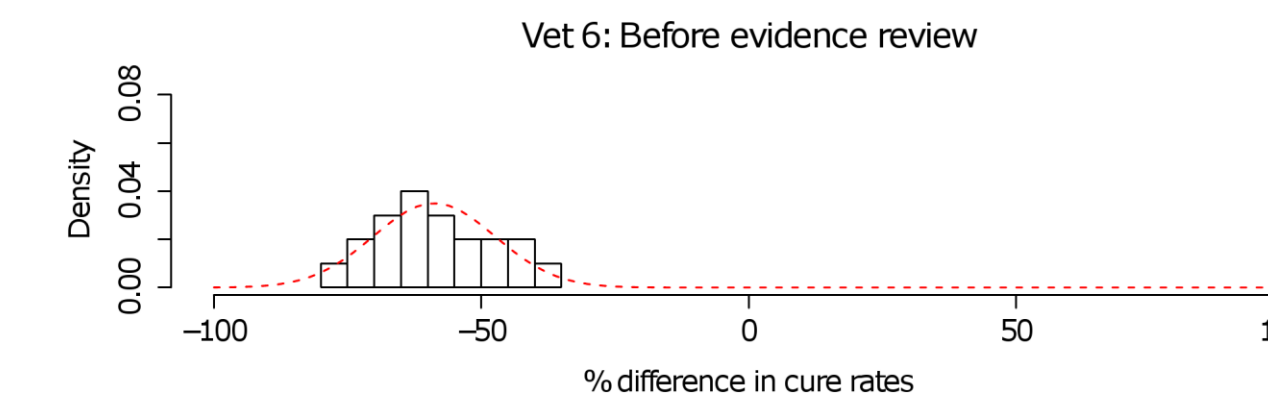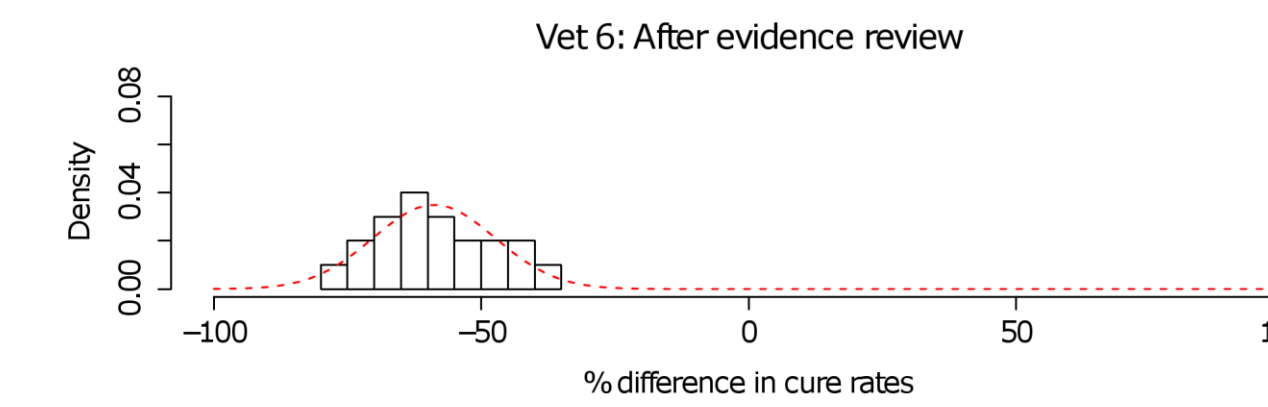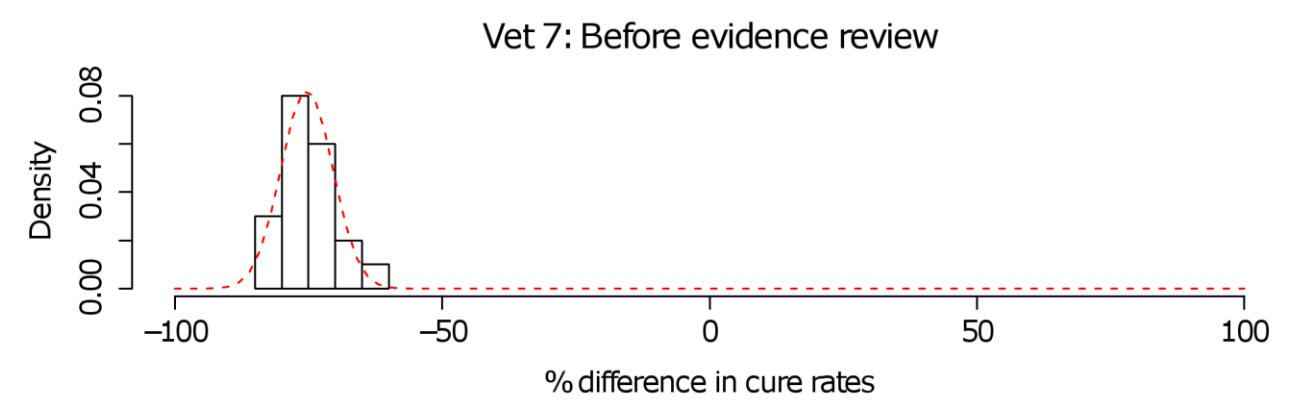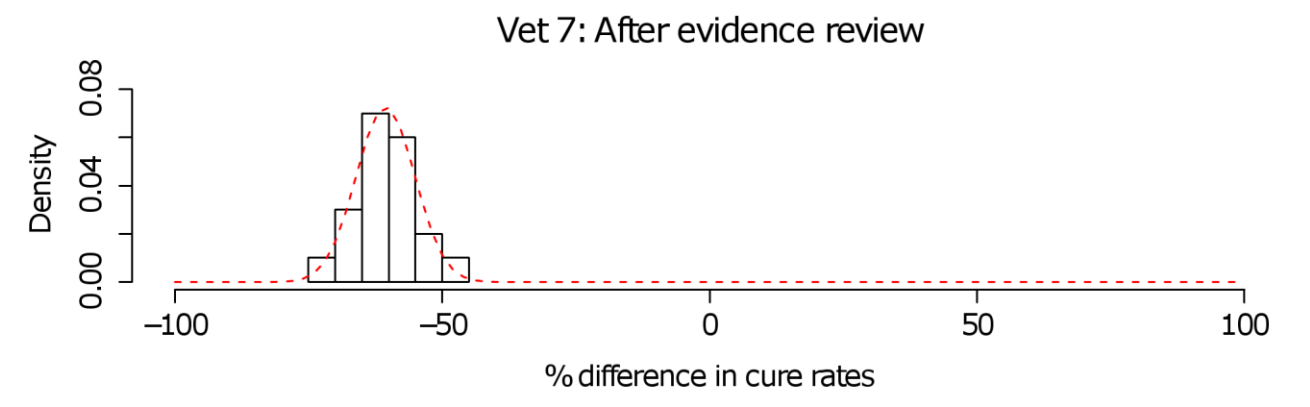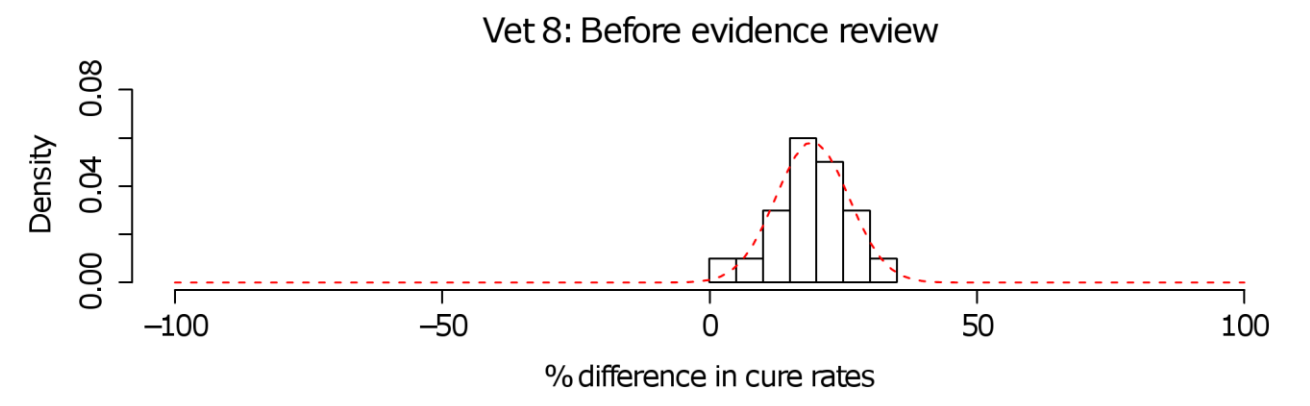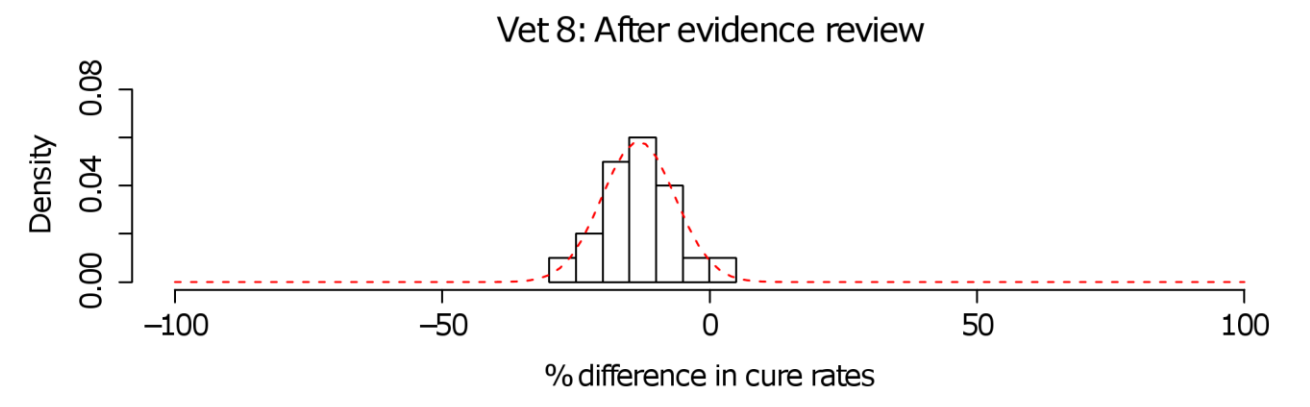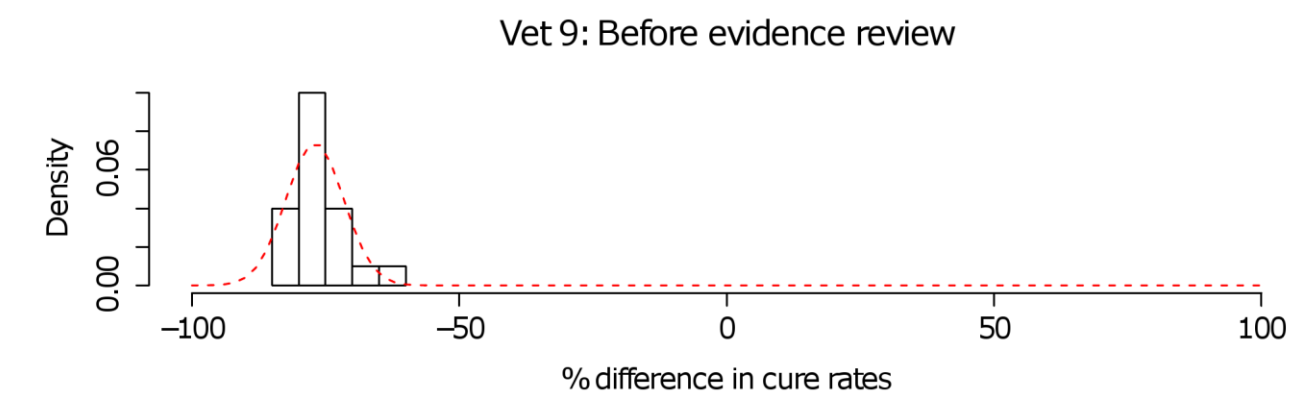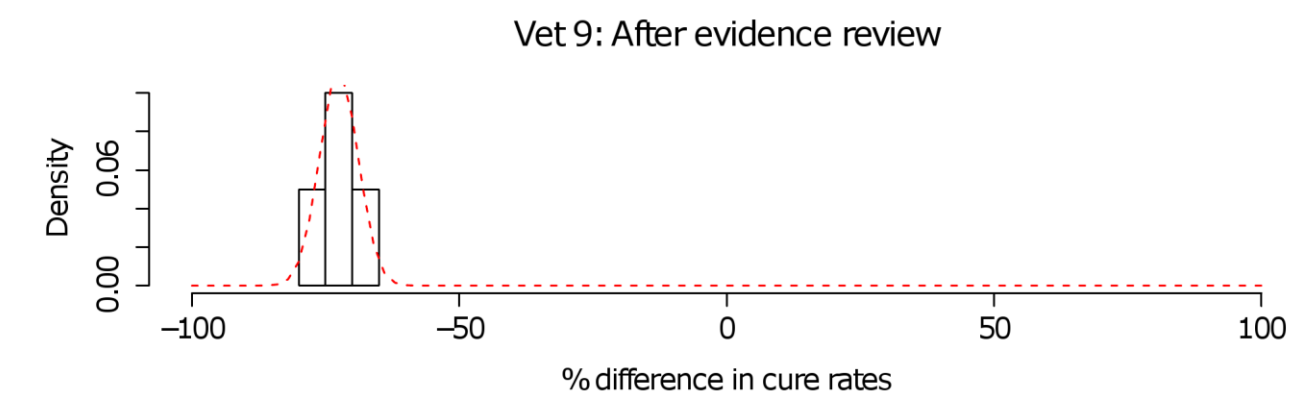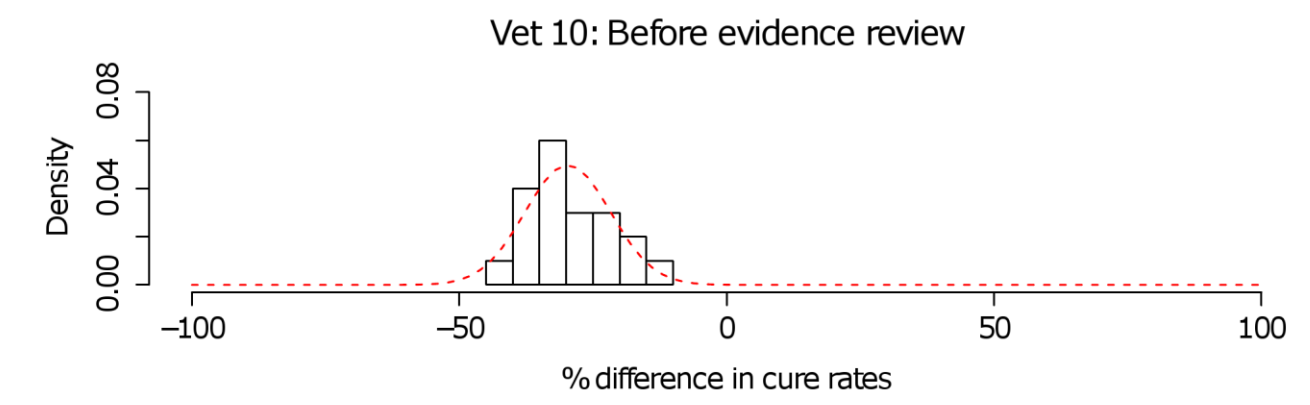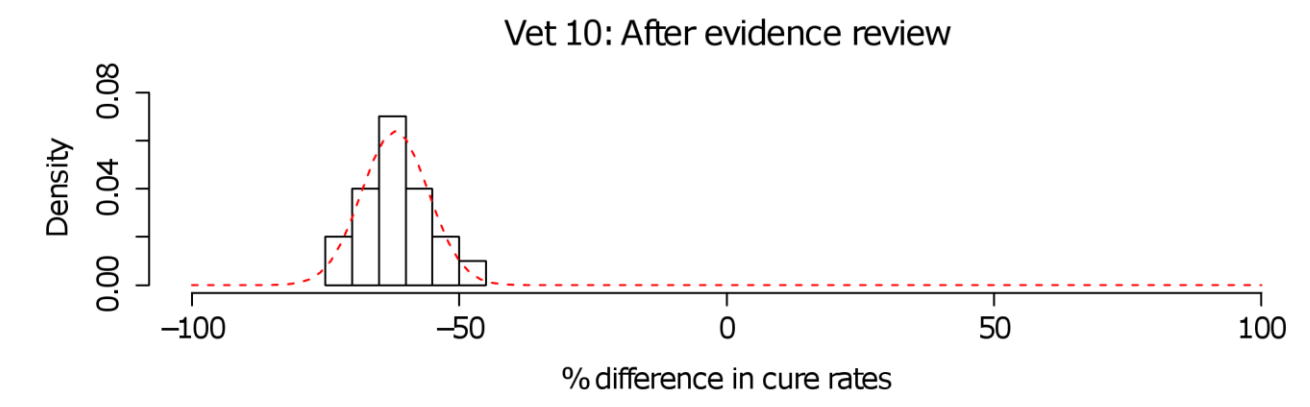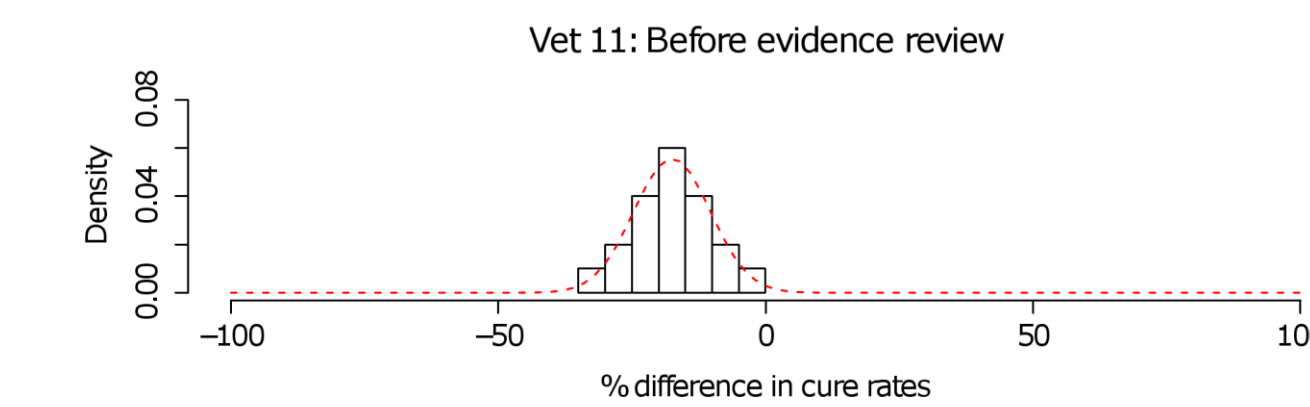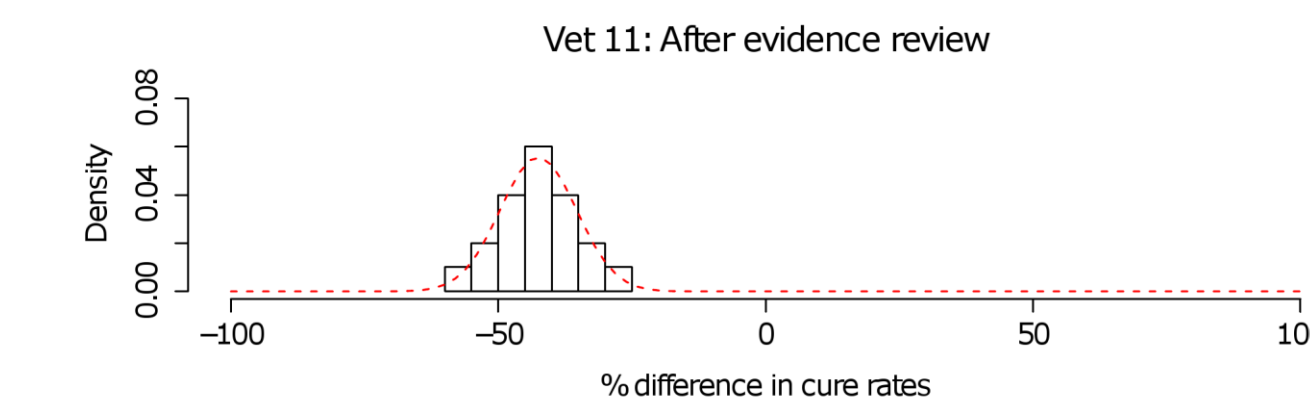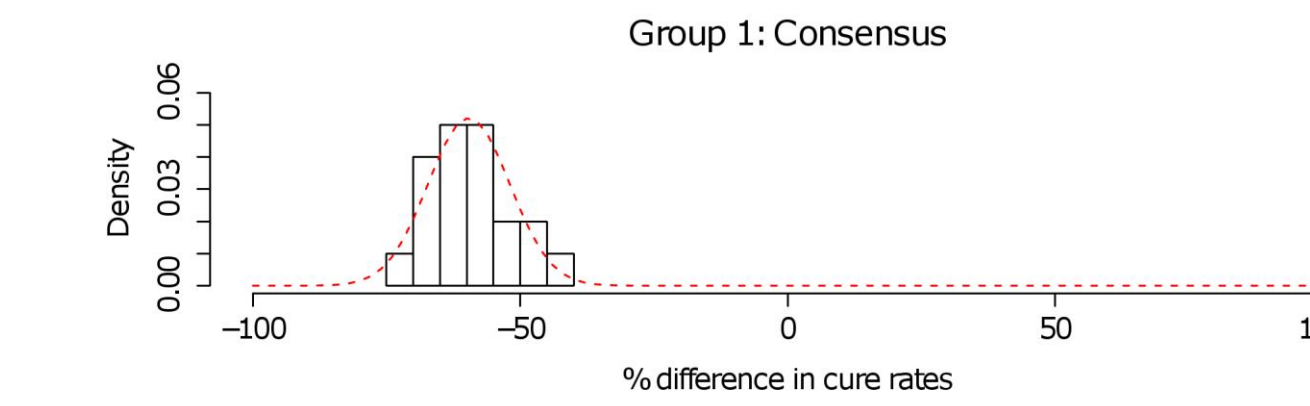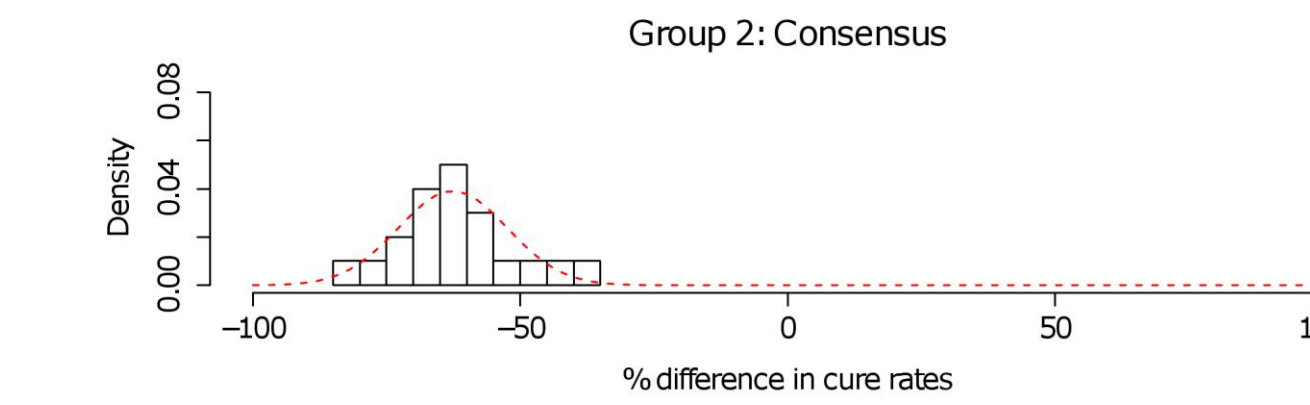

Supplement: pone.0064175.s003.pdf [file pone.0064175.s003.pdf]
