# Supplementary material for: How Does Reviewing the Evidence Change Veterinary Surgeons’ Beliefs Regarding the Treatment of Ovine Footrot? A Quantitative and Qualitative Study
Source: PubMed Central journal article supplement (PMC3655936; doi:10.1371/journal.pone.0064175), 2013-05-16
Supplement: pone.0064175.s002.pdf [file pone.0064175.s002.pdf]

### Example 1

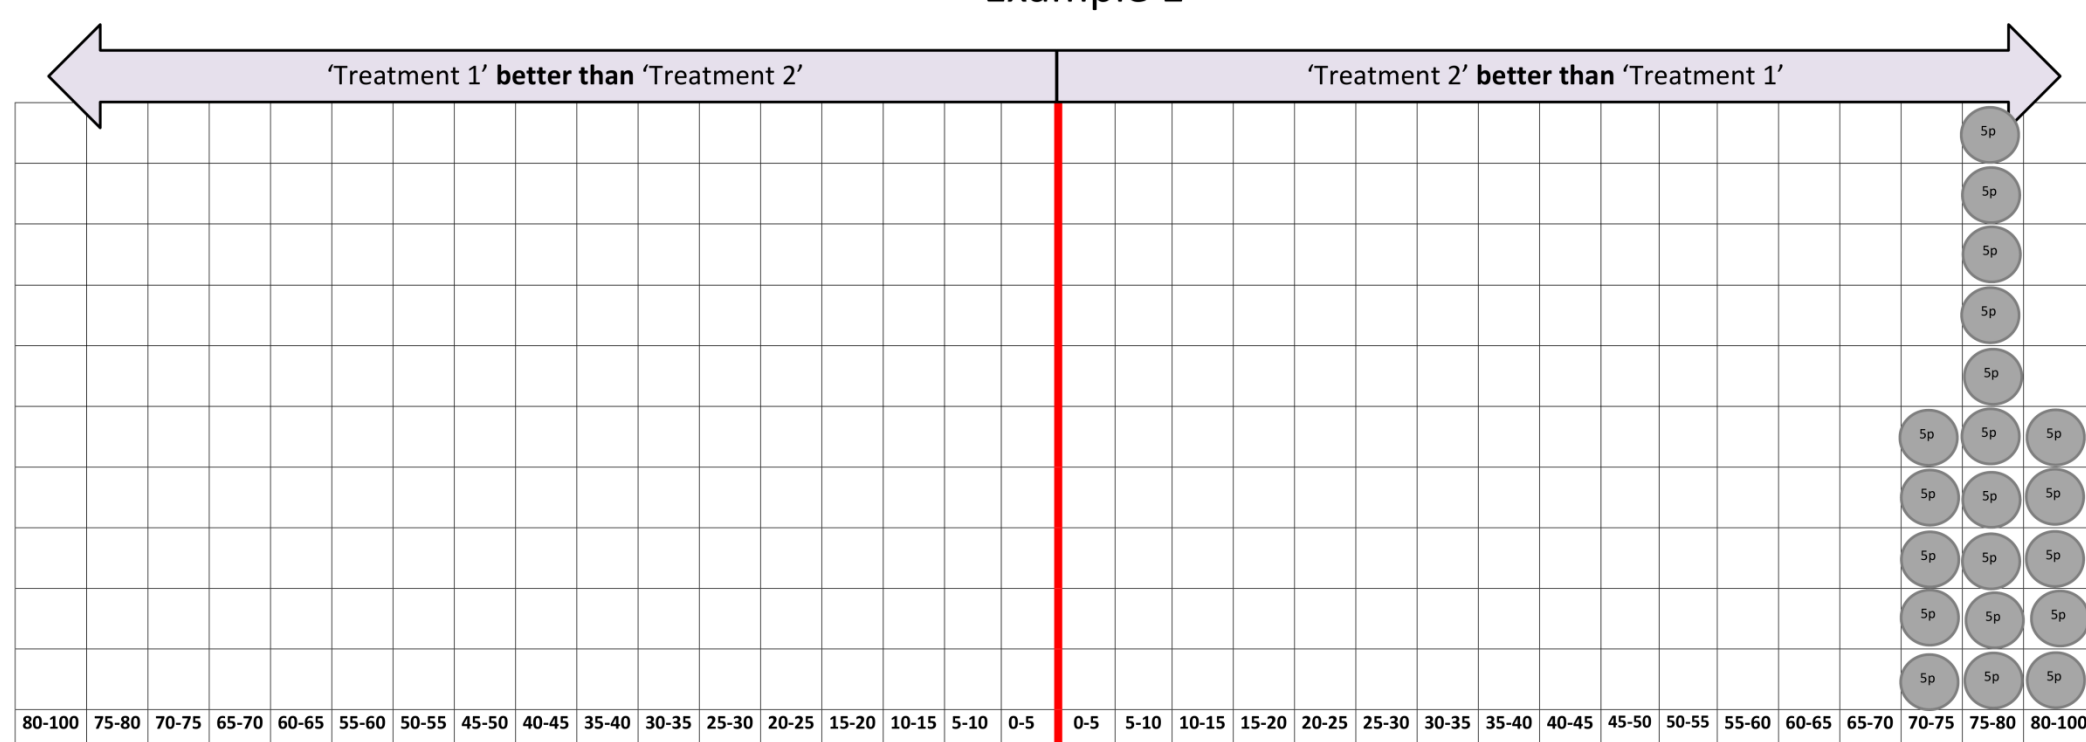

The difference between the cure rates (%)

### Example 2

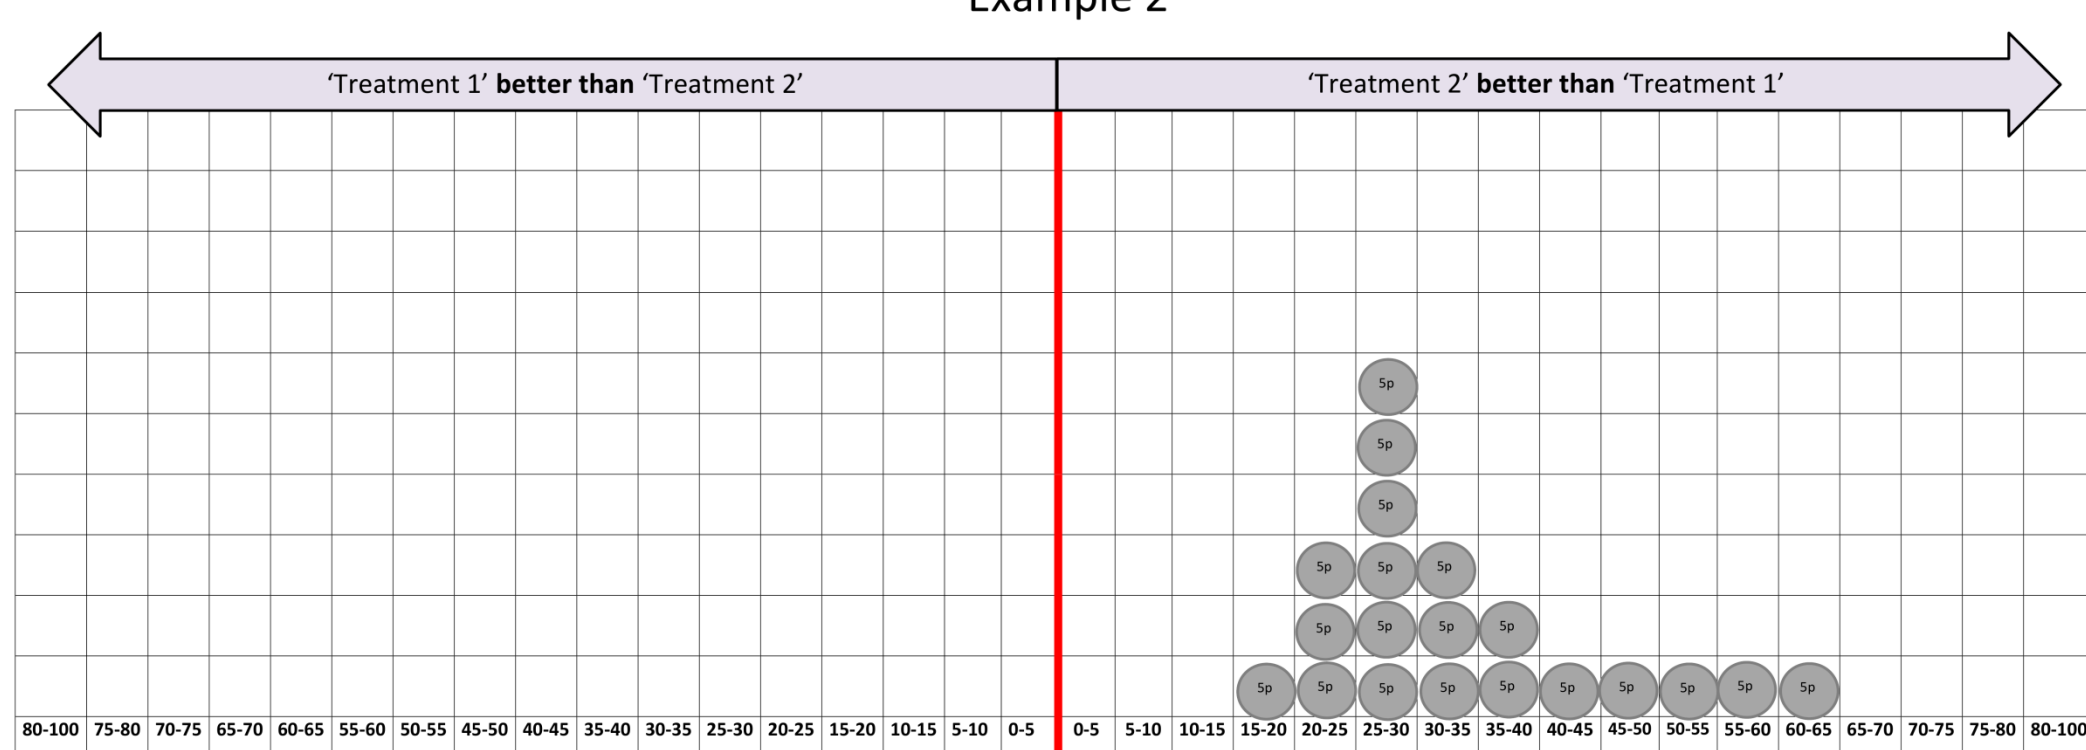

The difference between the cure rates (%)

### Example 3

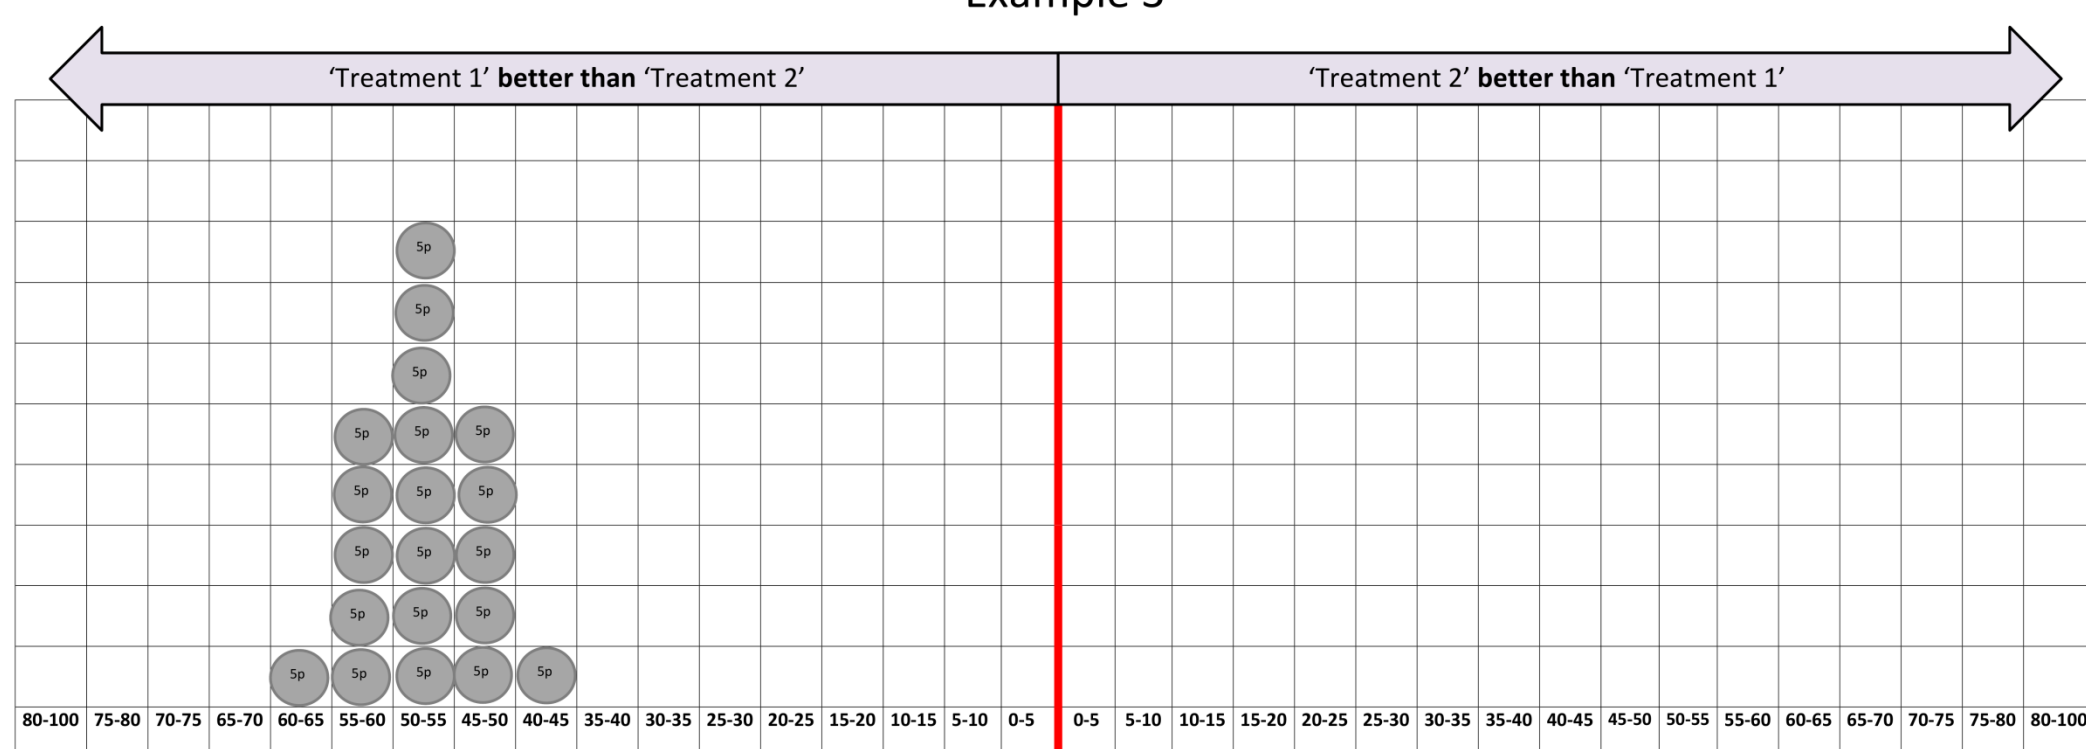

The difference between the cure rates (%)

### Example 4

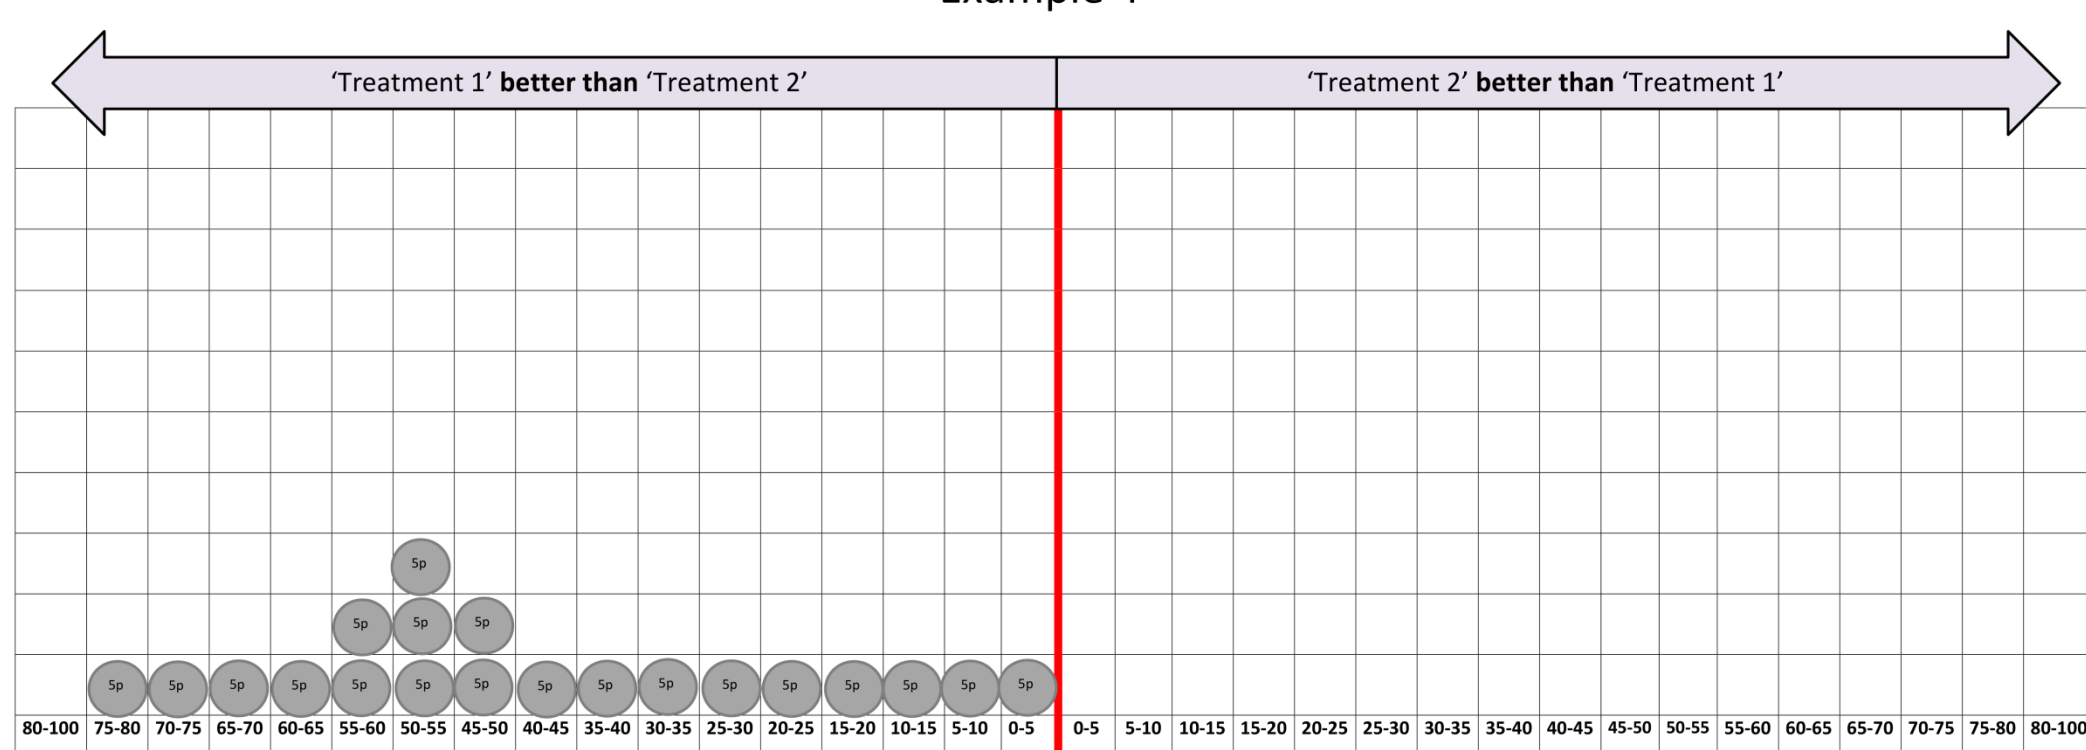

The difference between the cure rates (%)

### Example 5

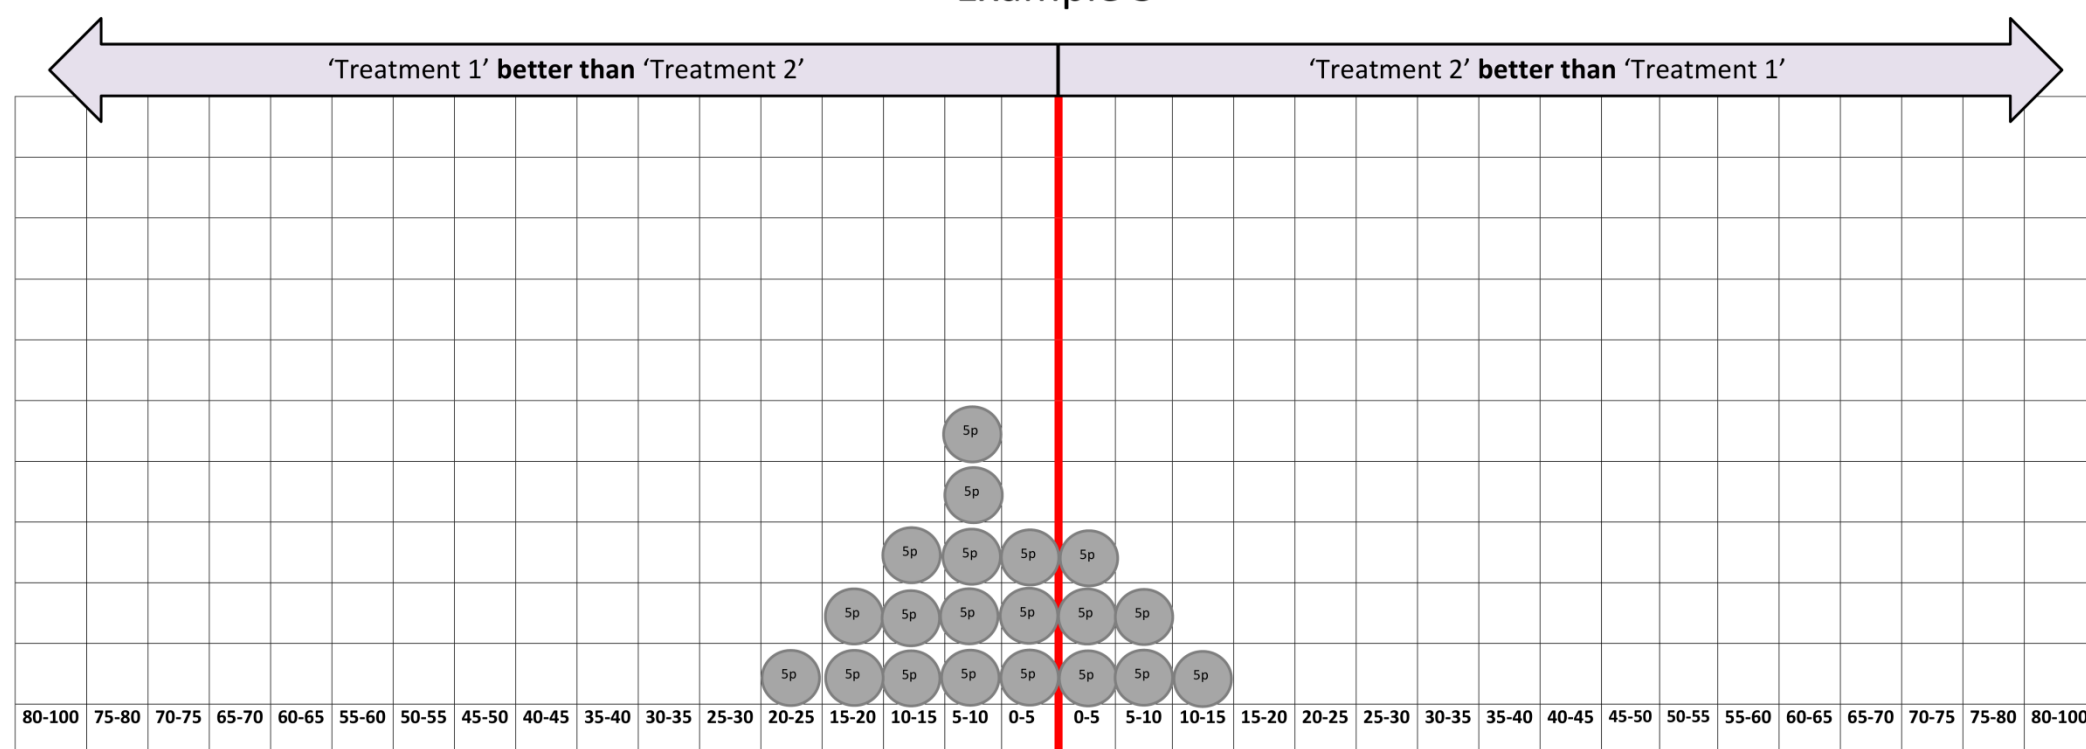

The difference between the cure rates (%)

### Example 6

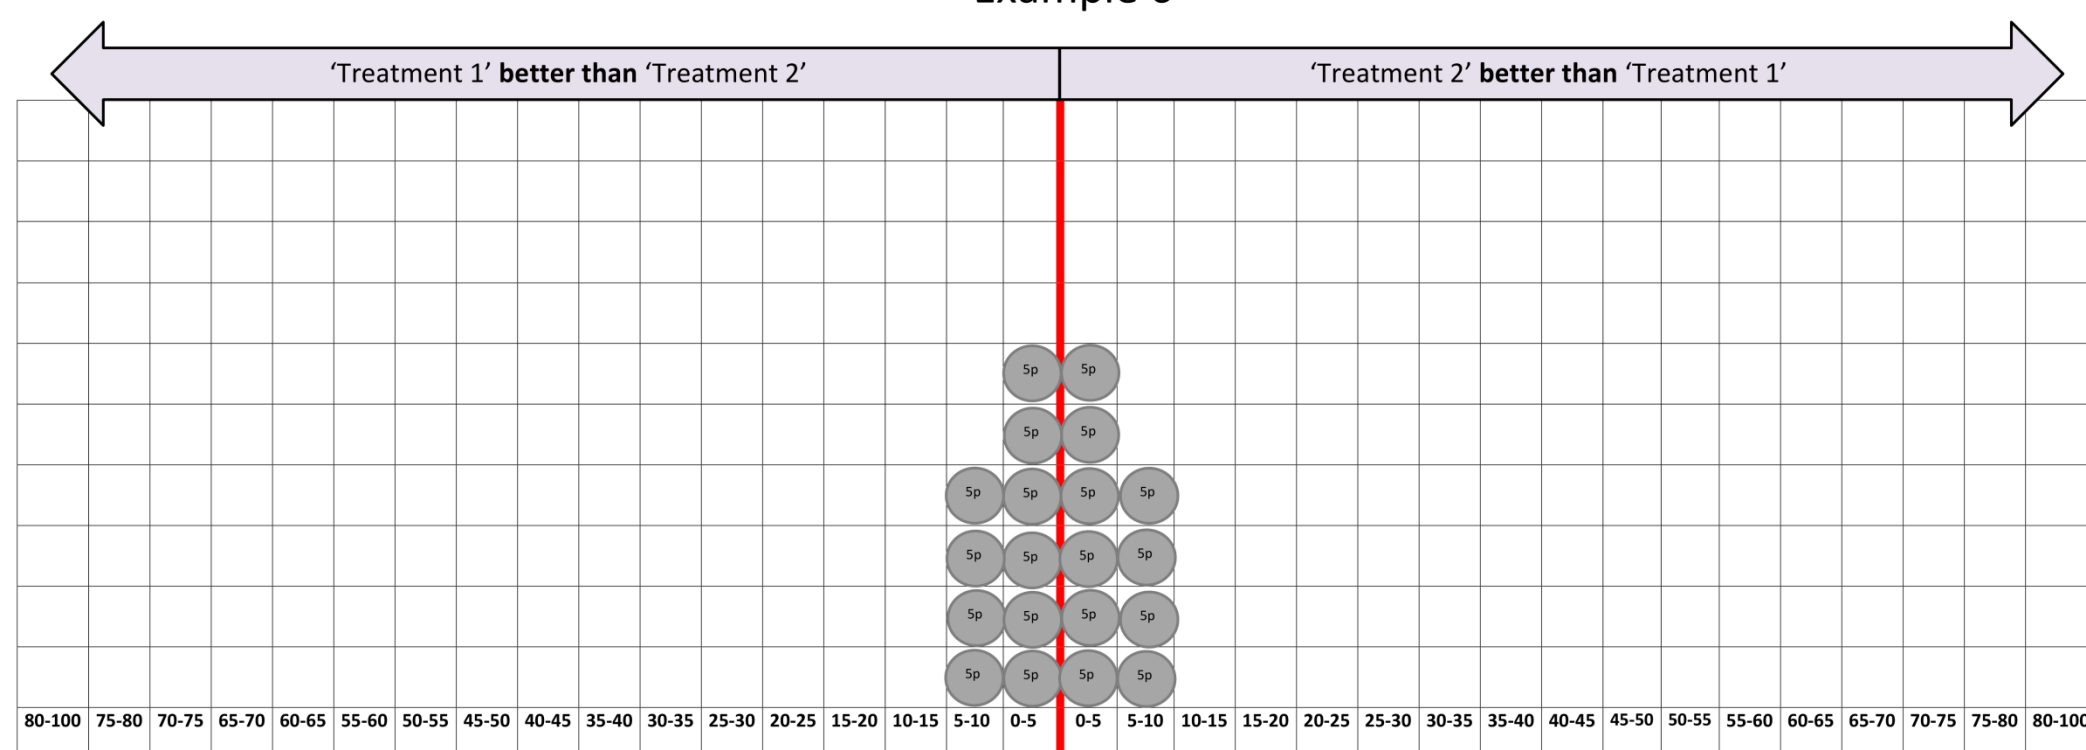

The difference between the cure rates (%)
